# Supplementary figures and images for: Enhanced IRE1α Phosphorylation/Oligomerization-Triggered XBP1 Splicing Contributes to Parkin-Mediated Prevention of SH-SY5Y Cell Death under Nitrosative Stress
Source: MDPI journal article supplement (doi:10.3390/ijms24032017), 2023-01-19

Figure S1

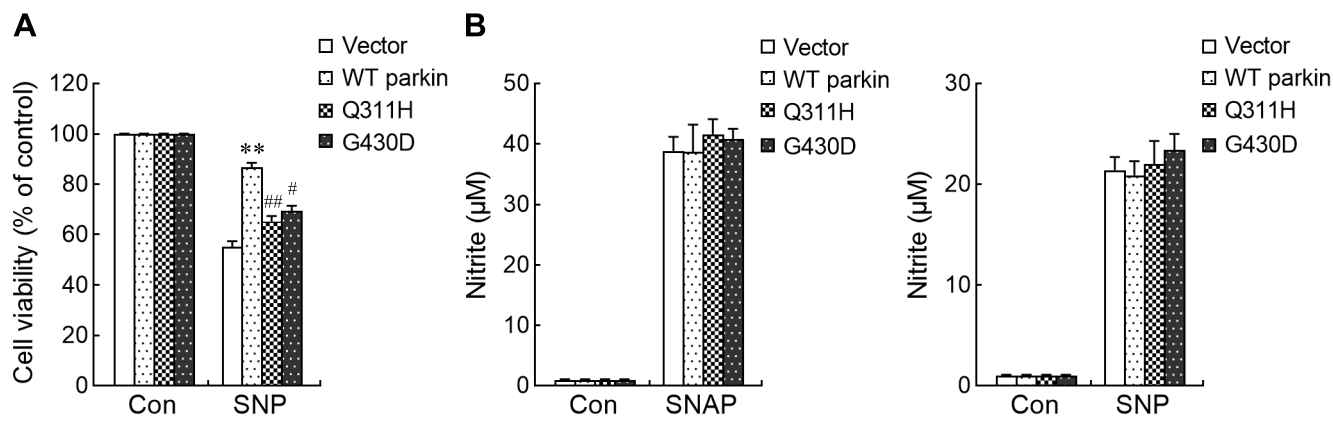

Figure S2

Fig. 1E

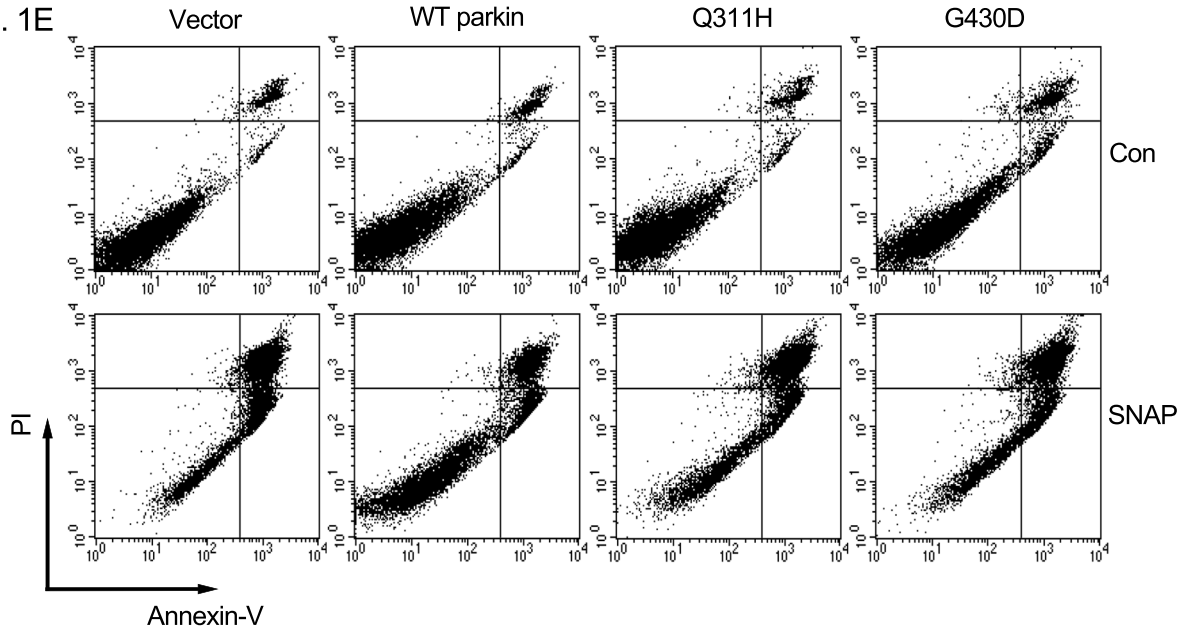

Fig. 2D

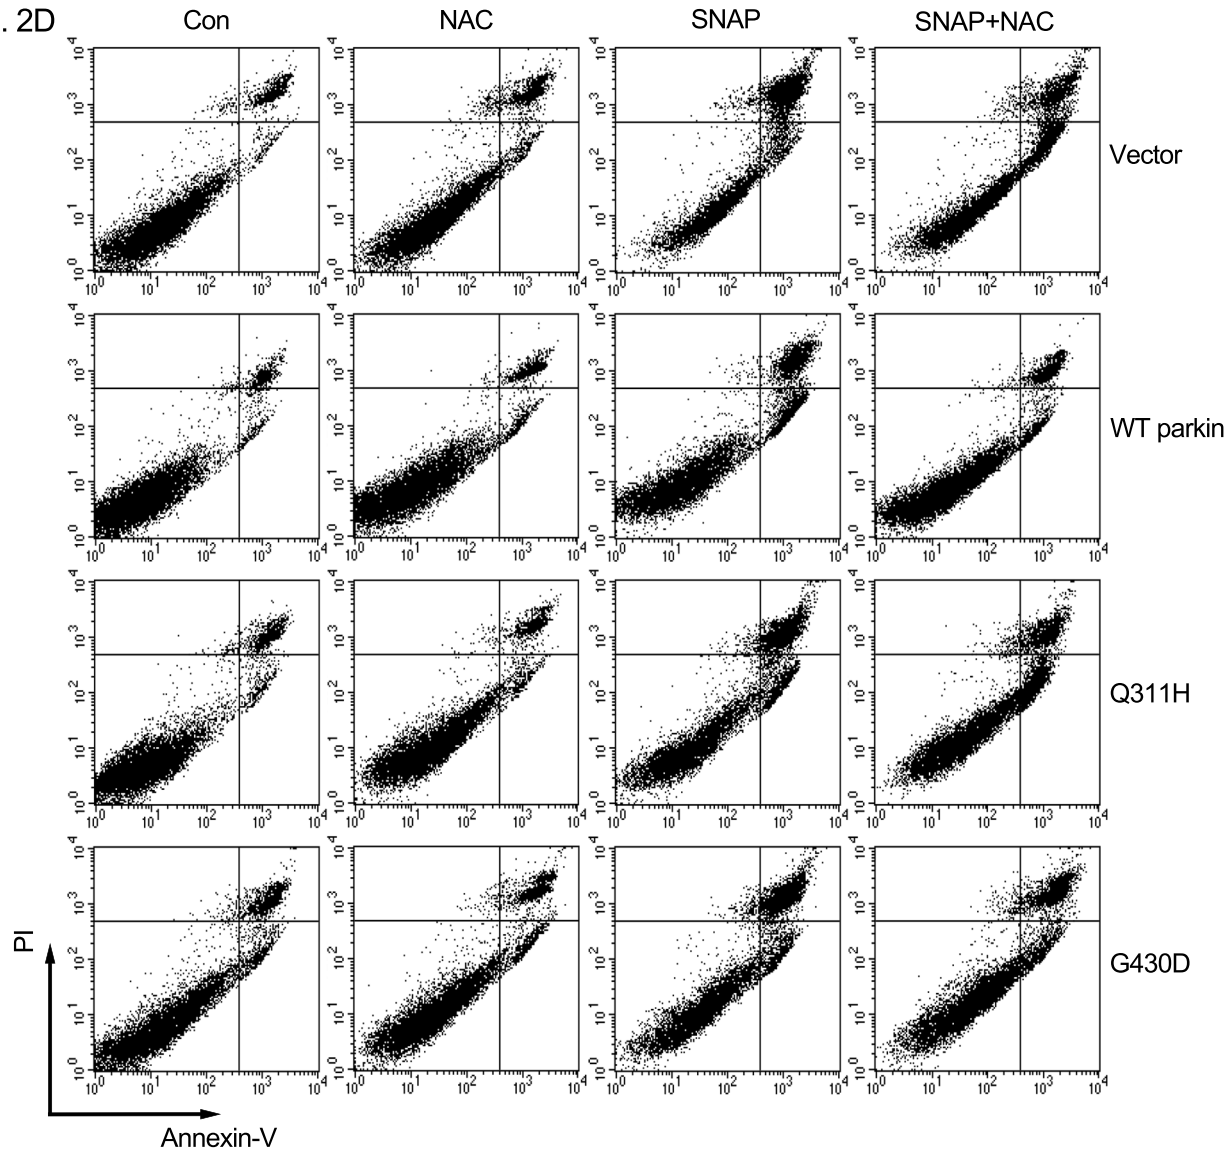

Figure S2

Fig. 4D

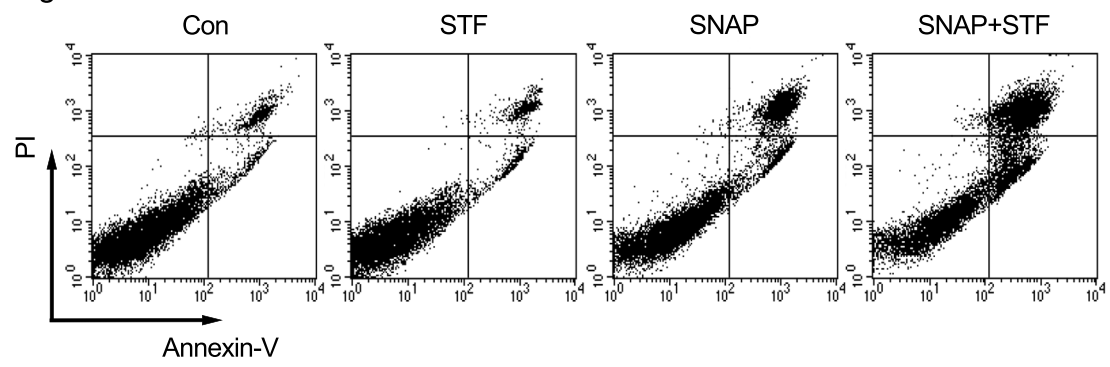

Figure S3

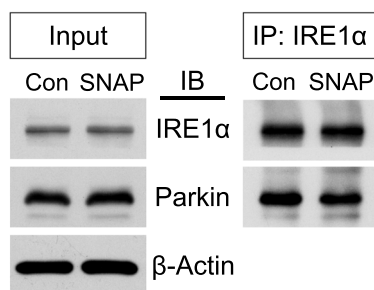

Supplement: s1 [file s1]
